# Supplementary material for: Effects of the number of cyclometalated rings and ancillary ligands on the rate of MeI oxidative addition to platinum(ii)–pincer complexes
Source: Royal Society of Chemistry journal article supplement (doi:10.1039/c9dt00205g), 2019-01-01
Supplement: c9dt00205g1.pdf [file c9dt00205g1.pdf]

## Supporting Information

### Effects of the number of cyclometalated ring and ancillary ligands on the rate of MeI oxidative addition to platinum(II)-pincer complexes

Peyman Hamidizadeh, S. Masoud Nabavizadeh\* and S. Jafar Hoseini

*Professor Rashidi Laboratory of Organometallic Chemistry, Department of Chemistry, College of Sciences, Shiraz University, Shiraz, 71467-13565, Iran*

#### XYZ Cartesian and energy of optimized structures

**[(C<sup>^N^C</sup>)Pt(PPh<sub>2</sub>Me)], 2a**  
Zero-point correction= 0.453232 (Hartree/Particle)  
Thermal correction to Energy= 0.481223  
Thermal correction to Enthalpy= 0.482167  
Thermal correction to Gibbs Free Energy= 0.392551  
Sum of electronic and zero-point Energies= -1672.522702  
Sum of electronic and thermal Energies= -1672.494711  
Sum of electronic and thermal Enthalpies= -1672.493767  
Sum of electronic and thermal Free Energies= -1672.583382

|    |             |             |             |
|----|-------------|-------------|-------------|
| Pt | 0.59485700  | -0.13296900 | -0.03838800 |
| P  | -1.50287100 | -1.02824900 | -0.36191400 |
| C  | -1.28177900 | 2.42815400  | 0.55424400  |
| H  | -2.17855300 | 1.82891300  | 0.42904800  |
| C  | -1.44813100 | 3.78093400  | 0.87312600  |
| H  | -2.45008800 | 4.18877000  | 0.98926800  |
| C  | -0.33639400 | 4.60867700  | 1.04163900  |
| H  | -0.45902000 | 5.66008800  | 1.28704800  |
| C  | 0.93872500  | 4.06783300  | 0.89360300  |
| C  | 3.67512300  | 2.75671300  | 0.53943500  |
| C  | 4.84337300  | 2.01589700  | 0.37047000  |
| H  | 5.80863400  | 2.50802000  | 0.44780400  |
| C  | 4.78454400  | 0.64944200  | 0.10316100  |
| H  | 5.69479800  | 0.07701300  | -0.02786200 |
| C  | 3.53272400  | 0.02941600  | 0.00568000  |
| C  | 2.43800300  | 2.10900300  | 0.43409300  |
| C  | 1.10111200  | 2.70931300  | 0.57840200  |
| C  | -2.52423600 | 0.00627100  | -1.50543000 |
| C  | -3.89184800 | 0.24620600  | -1.31038800 |
| H  | -4.39530000 | -0.13550600 | -0.42777100 |
| C  | -4.61851500 | 0.99018300  | -2.24419700 |
| H  | -5.67581500 | 1.17615100  | -2.07610300 |
| C  | -3.99024900 | 1.49453800  | -3.38419000 |
| H  | -4.55695200 | 2.07296000  | -4.10859200 |
| C  | -2.62788000 | 1.25762400  | -3.58713100 |
| H  | -2.13039000 | 1.65123300  | -4.46923300 |
| C  | -1.89791100 | 0.52423100  | -2.65105200 |
| H  | -0.83339600 | 0.36312600  | -2.80173900 |
| C  | -2.47969000 | -1.24387500 | 1.18508200  |

|   |             |             |             |
|---|-------------|-------------|-------------|
| C | -2.07095600 | -0.58177100 | 2.35428500  |
| H | -1.19504600 | 0.05835300  | 2.32536300  |
| C | -2.77947000 | -0.74401700 | 3.54662500  |
| H | -2.44881200 | -0.22621000 | 4.44262100  |
| C | -3.90239200 | -1.57263100 | 3.58891000  |
| H | -4.45131300 | -1.70139700 | 4.51764100  |
| C | -4.31481600 | -2.24144500 | 2.43380900  |
| H | -5.18436200 | -2.89221800 | 2.45981800  |
| C | -3.60814500 | -2.08112400 | 1.24073600  |
| H | -3.94306200 | -2.61562800 | 0.35763200  |
| C | -1.67879800 | -2.67398800 | -1.19649700 |
| H | -1.41041100 | -3.48241300 | -0.51252900 |
| H | -1.01831400 | -2.70322200 | -2.06680700 |
| H | -2.70857300 | -2.82025700 | -1.53357200 |
| C | 1.88104100  | -1.78283200 | -0.32185100 |
| C | 1.65526800  | -3.15414000 | -0.52573600 |
| C | 3.25808100  | -1.39355900 | -0.25577600 |
| C | 2.69344400  | -4.08251500 | -0.67298400 |
| H | 0.64145600  | -3.53220900 | -0.57034400 |
| C | 4.30232200  | -2.31882500 | -0.40839300 |
| C | 4.02459800  | -3.66719000 | -0.62151400 |
| H | 2.45857900  | -5.13338500 | -0.82876500 |
| H | 5.33847100  | -1.99479400 | -0.35711000 |
| H | 4.83520400  | -4.38115100 | -0.73904500 |
| C | -0.01785500 | 1.83758600  | 0.39153200  |
| N | 2.41739600  | 0.77928800  | 0.17293400  |
| H | 1.80430600  | 4.71063800  | 1.03090400  |
| H | 3.72465900  | 3.81877000  | 0.74656900  |

**[(C<sup>^N^C</sup>)PtMeI(PPh<sub>2</sub>Me)], 3a**  
Zero-point correction= 0.493139 (Hartree/Particle)  
Thermal correction to Energy= 0.525104  
Thermal correction to Enthalpy= 0.526048  
Thermal correction to Gibbs Free Energy= 0.428746  
Sum of electronic and zero-point Energies= -1723.783669  
Sum of electronic and thermal Energies= -1723.751705  
Sum of electronic and thermal Enthalpies= -1723.750760  
Sum of electronic and thermal Free Energies= -1723.848063

|    |             |             |             |
|----|-------------|-------------|-------------|
| Pt | 0.41168500  | 0.14655300  | -0.26667800 |
| P  | -1.81148700 | 0.52424500  | 0.50100600  |
| C  | -0.83087600 | -2.57579800 | -1.49281100 |
| H  | -1.83423200 | -2.25659400 | -1.23303300 |
| C  | -0.68243600 | -3.80107200 | -2.15435200 |
| H  | -1.56237300 | -4.39553500 | -2.38970500 |
| C  | 0.58575900  | -4.26231000 | -2.51335400 |
| H  | 0.70504100  | -5.21467300 | -3.02225600 |
| C  | 1.70043400  | -3.47896800 | -2.22673500 |
| C  | 4.04913400  | -1.62874500 | -1.57122000 |
| C  | 4.99955800  | -0.65456800 | -1.27193900 |
| H  | 6.05023600  | -0.85356200 | -1.46100700 |
| C  | 4.61684900  | 0.57204700  | -0.73226400 |
| H  | 5.35970600  | 1.32579300  | -0.50184500 |
| C  | 3.26040100  | 0.81387900  | -0.48581800 |
| C  | 2.69860400  | -1.36351100 | -1.31629200 |
| C  | 1.55022900  | -2.24563100 | -1.57086600 |
| C  | -2.93210000 | -0.92449600 | 0.74673100  |
| C  | -4.29552700 | -0.86430000 | 0.41594700  |
| H  | -4.70664800 | 0.01315100  | -0.06981000 |
| C  | -5.14200700 | -1.93512700 | 0.71372800  |
| H  | -6.19368400 | -1.87433800 | 0.44816500  |
| C  | -4.64176800 | -3.07184600 | 1.35014500  |
| H  | -5.30224500 | -3.90294600 | 1.58126900  |
| C  | -3.28805300 | -3.13512600 | 1.68958900  |
| H  | -2.88901500 | -4.01537800 | 2.18560400  |
| C  | -2.43678000 | -2.07194300 | 1.38868000  |
| H  | -1.38559400 | -2.13418600 | 1.64920600  |
| C  | -2.77628000 | 1.67663200  | -0.55373600 |
| C  | -3.17316400 | 1.27307000  | -1.84158000 |
| H  | -2.93235200 | 0.27700700  | -2.20108700 |
| C  | -3.89317700 | 2.13727400  | -2.66503300 |
| H  | -4.19703900 | 1.80721700  | -3.65420400 |
| C  | -4.21978000 | 3.42175700  | -2.22054600 |
| H  | -4.77742600 | 4.09572200  | -2.86446600 |
| C  | -3.83013400 | 3.83266900  | -0.94568000 |
| H  | -4.08426200 | 4.82672800  | -0.58933600 |
| C  | -3.11604300 | 2.96523300  | -0.11434300 |
| H  | -2.83768900 | 3.30294000  | 0.87806900  |
| C  | -1.84130800 | 1.25505400  | 2.19423800  |
| H  | -1.19468200 | 2.13008000  | 2.26991900  |
| H  | -1.46334800 | 0.49356300  | 2.87909100  |
| H  | -2.86843800 | 1.51383800  | 2.46705700  |
| C  | 1.24483500  | 2.03708000  | 0.25665000  |
| C  | 0.66656900  | 3.24654800  | 0.65629500  |
| C  | 2.65647200  | 2.04148500  | 0.05553900  |
| C  | 1.43224300  | 4.39107800  | 0.91033000  |
| H  | -0.41058100 | 3.32911500  | 0.75953300  |
| C  | 3.42744600  | 3.18626400  | 0.31644500  |
| C  | 2.81928900  | 4.35932400  | 0.75567600  |
| H  | 0.94129500  | 5.30914400  | 1.22468800  |
| H  | 4.50337500  | 3.17209900  | 0.16630400  |
| H  | 3.41909800  | 5.24233300  | 0.95688100  |
| C  | 0.26782500  | -1.77548100 | -1.16149700 |
| N  | 2.37038300  | -0.16212300 | -0.78426300 |
| H  | 2.68461000  | -3.82715600 | -2.52809900 |
| H  | 4.35194300  | -2.58088000 | -1.98940300 |
| I  | 1.23483900  | -1.01200500 | 2.35186900  |
| C  | 0.05725300  | 0.97490400  | -2.17558800 |
| H  | -0.57792600 | 0.29680000  | -2.74375300 |
| H  | -0.41030900 | 1.95038300  | -2.05551700 |
| H  | 1.03344400  | 1.07337900  | -2.65375000 |

**[[C^N^C]PtMe(PPh<sub>2</sub>Me)]<sup>+</sup>, IMa**

|                                              |                             |
|----------------------------------------------|-----------------------------|
| Zero-point correction=                       | 0.492836 (Hartree/Particle) |
| Thermal correction to Energy=                | 0.521904                    |
| Thermal correction to Enthalpy=              | 0.522848                    |
| Thermal correction to Gibbs Free Energy=     | 0.433613                    |
| Sum of electronic and zero-point Energies=   | -1712.188915                |
| Sum of electronic and thermal Energies=      | -1712.159847                |
| Sum of electronic and thermal Enthalpies=    | -1712.158903                |
| Sum of electronic and thermal Free Energies= | -1712.248138                |

|    |             |             |             |
|----|-------------|-------------|-------------|
| Pt | -0.59719300 | -0.09650400 | 0.07780800  |
| P  | 1.59119700  | -0.97512700 | 0.49384100  |
| C  | 1.21685600  | 2.54233600  | -0.50920600 |
| H  | 2.12804900  | 2.00734000  | -0.26803200 |
| C  | 1.33981000  | 3.88179700  | -0.90182800 |
| H  | 2.32649900  | 4.33191000  | -0.97509800 |
| C  | 0.20455100  | 4.63656500  | -1.19396500 |
| H  | 0.29311000  | 5.67441300  | -1.50102600 |
| C  | -1.05282900 | 4.04722400  | -1.08068400 |
| C  | -3.74633900 | 2.67342200  | -0.68965500 |
| C  | -4.89476700 | 1.91570100  | -0.46587600 |
| H  | -5.87149400 | 2.37613700  | -0.57833100 |
| C  | -4.80387300 | 0.57550100  | -0.09434600 |
| H  | -5.69996700 | -0.00556800 | 0.08346400  |
| C  | -3.53959100 | -0.00659700 | 0.04288900  |
| C  | -2.49347300 | 2.07039500  | -0.53862900 |
| C  | -1.17438400 | 2.70487000  | -0.69038200 |
| C  | 2.57065800  | 0.21302200  | 1.49410800  |
| C  | 3.93433300  | 0.43529400  | 1.25394400  |
| H  | 4.43289500  | -0.05506400 | 0.42412700  |
| C  | 4.65756600  | 1.29741100  | 2.08191500  |
| H  | 5.71191400  | 1.46916700  | 1.88611700  |
| C  | 4.02915300  | 1.93504000  | 3.15316500  |
| H  | 4.59399000  | 2.60626600  | 3.79343300  |
| C  | 2.67214100  | 1.70926700  | 3.40158000  |
| H  | 2.17950700  | 2.20228400  | 4.23441000  |
| C  | 1.94356300  | 0.85412800  | 2.57538000  |
| H  | 0.88659800  | 0.69315900  | 2.77419000  |
| C  | 2.57545700  | -1.39275900 | -0.99207100 |
| C  | 2.74952600  | -0.43810500 | -2.01041500 |
| H  | 2.29915400  | 0.54459000  | -1.92321600 |
| C  | 3.50480700  | -0.74349200 | -3.14142500 |
| H  | 3.63356400  | 0.00461700  | -3.91790800 |
| C  | 4.08833700  | -2.00622300 | -3.27700400 |
| H  | 4.67276200  | -2.24374800 | -4.16097900 |
| C  | 3.91719400  | -2.96096900 | -2.27420500 |
| H  | 4.36751200  | -3.94424500 | -2.37146300 |
| C  | 3.16672300  | -2.65871700 | -1.13576000 |
| H  | 3.05503800  | -3.41635900 | -0.36897000 |
| C  | 1.66536200  | -2.46231100 | 1.58061300  |
| H  | 1.33211100  | -3.36562300 | 1.06929000  |
| H  | 1.02589500  | -2.28895000 | 2.44969000  |
| H  | 2.69571800  | -2.59987300 | 1.91989700  |
| C  | -1.85856700 | -1.77607900 | 0.45977700  |
| C  | -1.58707600 | -3.12240500 | 0.71825200  |
| C  | -3.23343800 | -1.40003100 | 0.40471800  |
| C  | -2.60471900 | -4.05382800 | 0.96271000  |
| H  | -0.56733800 | -3.48309500 | 0.72477100  |
| C  | -4.25380500 | -2.32986400 | 0.65597000  |
| C  | -3.94123300 | -3.65674400 | 0.94341100  |
| H  | -2.34770500 | -5.09045500 | 1.16473300  |

|   |             |             |             |
|---|-------------|-------------|-------------|
| H | -5.29638800 | -2.02788400 | 0.62348000  |
| H | -4.73428900 | -4.37273500 | 1.13729300  |
| C | -0.02609700 | 1.90761300  | -0.40234700 |
| N | -2.44775400 | 0.76122600  | -0.19008500 |
| H | -1.93527800 | 4.64059900  | -1.30065000 |
| H | -3.82474700 | 3.71676700  | -0.96820800 |
| C | -0.62603700 | -0.73594000 | -1.90946800 |
| H | -0.05852200 | 0.00333400  | -2.46984100 |
| H | -0.17708400 | -1.72548300 | -1.94716400 |
| H | -1.67297800 | -0.75902700 | -2.20710300 |

**TS**

Zero-point correction= 0.490953 (Hartree/Particle)  
 Thermal correction to Energy= 0.523394  
 Thermal correction to Enthalpy= 0.524338  
 Thermal correction to Gibbs Free Energy= 0.423200  
 Sum of electronic and zero-point Energies= -1723.763405  
 Sum of electronic and thermal Energies= -1723.730964  
 Sum of electronic and thermal Enthalpies= -1723.730020  
 Sum of electronic and thermal Free Energies= -1723.831158

|    |             |             |             |
|----|-------------|-------------|-------------|
| Pt | 0.00016500  | 0.43921400  | 0.48151200  |
| P  | 1.84952500  | -0.30207800 | -0.74134100 |
| C  | 0.25269900  | -2.36472500 | 2.07084500  |
| H  | 1.05071300  | -2.68610700 | 1.41275400  |
| C  | -0.15036400 | -3.23931200 | 3.08832700  |
| H  | 0.34125100  | -4.20365300 | 3.19504100  |
| C  | -1.17768200 | -2.88199900 | 3.96256600  |
| H  | -1.49254400 | -3.55640500 | 4.75395900  |
| C  | -1.80330900 | -1.64715400 | 3.80624500  |
| C  | -3.11640100 | 1.07008700  | 3.32345600  |
| C  | -3.61786700 | 2.32105100  | 2.96869000  |
| H  | -4.43966100 | 2.75044600  | 3.53404400  |
| C  | -3.07507700 | 3.02840500  | 1.89706800  |
| H  | -3.46701400 | 4.00180700  | 1.62908800  |
| C  | -2.01604000 | 2.46425500  | 1.17687500  |
| C  | -2.05967600 | 0.52716600  | 2.58293900  |
| C  | -1.40018900 | -0.77365100 | 2.78423800  |
| C  | 2.66188500  | -1.90002600 | -0.31322100 |
| C  | 3.63759200  | -1.94078800 | 0.69624900  |
| H  | 3.93888700  | -1.02768900 | 1.20048400  |

|   |             |             |             |
|---|-------------|-------------|-------------|
| C | 4.23274300  | -3.14993200 | 1.05632300  |
| H | 4.98799600  | -3.16513600 | 1.83696700  |
| C | 3.86204000  | -4.33421300 | 0.41402200  |
| H | 4.32692000  | -5.27512700 | 0.69427400  |
| C | 2.89316200  | -4.30335500 | -0.59074000 |
| H | 2.60034000  | -5.21884800 | -1.09670300 |
| C | 2.29404300  | -3.09469300 | -0.95286800 |
| H | 1.53962800  | -3.09750400 | -1.73283200 |
| C | 3.24305800  | 0.89727100  | -0.65181800 |
| C | 3.37313300  | 1.73435200  | 0.46790500  |
| H | 2.63161100  | 1.70261400  | 1.26078100  |
| C | 4.45068700  | 2.61661500  | 0.57061700  |
| H | 4.53881700  | 3.25752200  | 1.44315300  |
| C | 5.40476700  | 2.67934300  | -0.44680400 |
| H | 6.23897200  | 3.37089500  | -0.36985800 |
| C | 5.28397500  | 1.84993500  | -1.56450500 |
| H | 6.02293900  | 1.89284500  | -2.35951400 |
| C | 4.21413100  | 0.95951600  | -1.66508200 |
| H | 4.14607500  | 0.31708100  | -2.53714200 |
| C | 1.46923500  | -0.49411000 | -2.53603900 |
| H | 1.13501000  | 0.46364200  | -2.94009200 |
| H | 0.65886800  | -1.21553400 | -2.66344300 |
| H | 2.33968000  | -0.84682100 | -3.09463500 |
| C | -0.21187700 | 2.30162300  | -0.50980500 |
| C | 0.48754300  | 2.90586700  | -1.56418600 |
| C | -1.29593000 | 3.05662200  | 0.03653200  |
| C | 0.13877200  | 4.16115000  | -2.07754600 |
| H | 1.34709000  | 2.40903200  | -2.00264800 |
| C | -1.64812300 | 4.31531600  | -0.47542400 |
| C | -0.93621800 | 4.86823100  | -1.53756400 |
| H | 0.71075400  | 4.58572100  | -2.89930100 |
| H | -2.47855800 | 4.87184700  | -0.05008000 |
| H | -1.21453700 | 5.84096300  | -1.93304200 |
| C | -0.34185600 | -1.11006400 | 1.88383500  |
| N | -1.55915700 | 1.24305600  | 1.54708600  |
| H | -2.60805500 | -1.37294800 | 4.48290800  |
| H | -3.54035300 | 0.52591800  | 4.15830900  |
| C | -1.62419900 | -0.65766900 | -0.96557700 |
| H | -1.38408000 | -0.02156900 | -1.80099300 |
| H | -1.17298100 | -1.63059700 | -0.86277500 |
| H | -2.46414600 | -0.40608300 | -0.33806400 |
| I | -3.42798600 | -1.88464000 | -2.67549700 |
